# Supplementary material for: Effect of Sleep Extension on Objectively Assessed Energy Intake Among Adults With Overweight in Real-life Settings: A Randomized Clinical Trial
Source: PubMed Central journal article supplement (PMC8822469; doi:10.1001/jamainternmed.2021.8098), 2022-02-07
Supplement: jamainternmed-e218098-s001.pdf [file jamainternmed-e218098-s001.pdf]

# 1 PROTOCOL TITLE: HOME SLEEP AND METABOLISM

## 2 3 **Purpose and Hypothesis**

4 The overall purpose of this study is to investigate the effects of sleep extension on glucose  
5 metabolism and energy balance in habitual short sleepers, while they live in their normal environment.  
6 The specific aims are to test the hypotheses that: 1) sleep extension will improve insulin sensitivity  
7 and beta cell function; 2) sleep extension will reduce average daily energy intake; 3) sleep extension  
8 will increase total daily energy expenditure, mainly due to an increase in physical activity. We further  
9 hypothesize that the amount of sleep extension (as quantified by continuous actigraphy monitoring)  
10 will predict the magnitude of the beneficial effects on glucose metabolism, energy intake and energy  
11 expenditure.

## 12 13 Potential Benefits of the proposed research to the subjects and others

14 The information gained from these studies may provide novel and important insights to our  
15 understanding of the processes underlying the relationships between sleep and energy metabolism.  
16 Furthermore, the findings are expected to provide key data needed for the design of future large-scale  
17 clinical trials that will determine whether improving sleep duration could be a novel behavioral strategy  
18 to counteract the current epidemics of diabetes and obesity. If the proposed study demonstrates a  
19 clear benefit of sleep extension, these findings could be translated into clinical practice such that it  
20 may provide a strong incentive to millions of Americans to implement “healthy sleep habits” as part of  
21 traditional lifestyle regimens aiming to prevent or treat diabetes and obesity. The risks are only  
22 minimal and the risk-to-benefit ratio is very small.

## 23 24 **Methodology**

### 25 Study protocol

26 This is a randomized controlled parallel-group study in overweight adults (age: 21-40 years  
27 and BMI=25.0-29.9 kg/m<sup>2</sup>) who habitually sleep on average 6.5 hours or less per night (as confirmed  
28 by actigraphy). After 2-weeks of habitual sleep [baseline] period, subjects will be randomized to either  
29 2-weeks of sleep extension (Extension group, n=40) or 2-weeks of continued habitual sleep (Control  
30 group, n=40). We will perform the same procedures during each 2-week sleep period and changes  
31 from baseline will be compared between the 2 groups. Randomization assignment will be prepared by  
32 a statistician prior to the study (with gender as the stratification factor to ensure balance between  
33 groups) and be kept in sealed envelopes until subjects complete the first 2-week habitual sleep  
34 [baseline] period (i.e. until Day15).

35 The subjects will be blinded to randomization and sleep extension in order to effectively capture  
36 habitual sleep patterns. This blinding is necessary based on a large randomized controlled trial at  
37 NIH/NIDDK (led by Dr.Cizza) showing that if the subjects know about the importance of sleep and  
38 sleep extension intervention when they start the study, they begin extending their sleep before the  
39 sleep intervention, which modifies the “true” study baseline (Cizza et al. Plos One 2014). We will  
40 debrief the habitual sleep group at the end of the study. A debriefing script for habitual sleep group will  
41 fully explain the 2 sleep groups and the subjects will be told which group they were randomized. The  
42 sleep extension group will be debriefed at the end of 2-week baseline period with a separate  
43 debriefing script. All subjects will be provided with information about the beneficial effects of good  
44 sleep habits for health at the end of the study.

45 Sleep-wake patterns will be continuously monitored throughout the protocol by actiwatch.  
46 Body composition will be measured by dual-energy X-ray absorptiometry (DXA) in the morning of  
47 days 1 and 15, and in the morning following the day 28. On the first morning of each 2-week sleep  
48 period, the subjects will provide baseline urine sample before they ingest 18O- and 2H-labeled water  
49 and urine samples (at 1h, 2h, 3h and 4h) after dosing with labeled water will be collected. On last  
50 morning of each 2-week sleep period, two more urine samples will be collected and resting metabolic  
51 rate will be measured under basal conditions (indirect calorimetry). Subjects will then undergo a mixed  
52 meal tolerance test (MTT) during which they will consume a standardized liquid meal and their  
53 metabolic rate will be simultaneously measured by indirect calorimetry under resting conditions for the

54 next 4 hours in the postprandial state for assessments of thermic effect of meal. Blood samples will be  
55 collected during MTT for measurements of glucose, insulin and c-peptide. Anthropometric  
56 measurements including body weight and height will be performed in the CRC prior to metabolic  
57 testing in the morning; and subjects will measure and record their body weight every morning at  
58 home, using calibrated scales provided by the investigators. On certain days during the study, they  
59 will also complete visual analog scales for appetite and sleepiness before and after main meals.

60 During the first 2-week baseline period, all subjects will be asked to follow their habitual  
61 bedtimes at home. On Day 15, subjects who are randomized to the extension group will begin the  
62 sleep extension intervention and receive sleep hygiene recommendations. Actiwatch data from the  
63 first 2-week [baseline] period will be reviewed in order to accommodate the extended bedtimes in  
64 subject's daily routine in the best possible way. Subjects will be asked to follow individually designed  
65 bedtimes aiming to increase the bedtime duration to 8.5 hours per night, taking into account personal  
66 schedules and priorities. On Day 22, actigraphy data from the first week of the sleep extension  
67 intervention will be reviewed and further adjustments on bedtimes will be done, as needed. Subjects  
68 who are randomized to control group will be told to continue their habitual sleep habits until the end of  
69 the study. Control group will also meet with the investigators (but will not receive sleep hygiene  
70 recommendations) on Day15 and Day 22 to review the actiwatch data and to balance the amount of  
71 time spent with subjects in each group.

#### 72 73 Resting metabolic rate and thermic effect of meal by indirect calorimetry

74 Resting metabolic rate will be measured under basal conditions after a 12-hour fast for 40  
75 minutes. The metabolic system will be calibrated before each measurement using a mixed gas tank of  
76 5% CO<sub>2</sub>, 21% O<sub>2</sub> and balance nitrogen and a single tank of nitrogen only. This portable metabolic  
77 system measures the concentration of oxygen and carbon dioxide in air streams entering and exiting  
78 a clear plastic hood (canopy) placed over the subject's head. Subject will be asked to remain in bed  
79 (awake and motionless) for the entire duration of the procedure. After a 10-minute period of  
80 habituation, respiratory gas exchange will be measured and averaged over 30 minutes to determine  
81 the resting metabolic rate. Measurements will be performed under continuous monitoring of our  
82 trained personnel of the CRC metabolic kitchen under the supervision of the Bionutrition Research  
83 Manager.

84 After the subjects ingest the standardized liquid mixed meal, they will then return to a resting  
85 position in bed and their metabolic rate will be measured by indirect calorimetry (simultaneously with  
86 blood sampling) for the next 4 hours in the postprandial state to assess thermic effect of meal. The  
87 meal will provide 54% of the energy from carbohydrate, 21% from fat, and 25% from protein. Blood  
88 samples will be time marked during metabolic rate measurements and artifacts due to blood sampling  
89 will be excluded, as necessary. Blood samples will be collected at -10, -5, 0, 10, 20, 30, 60, 90, 120,  
90 150, 180 and 240 min. Indices of insulin sensitivity, beta cell responsiveness, hepatic insulin  
91 extraction, and disposition index will be derived using the oral minimal model <sup>1</sup>. The area under the 4-  
92 h postprandial curve minus the resting metabolic rate will be divided by the caloric content of meal  
93 and multiplied by 100 to obtain an estimate of the thermic effect of meal (in % of energy intake).

#### 94 95 Doubly labeled water (DLW) method

96 This method uses two stable isotopic tracers safe for use in humans. The principle of the  
97 method is that after a loading dose of water labeled with deuterium, a stable isotope of hydrogen, and  
98 the stable isotope <sup>18</sup>O, these tracers quickly equilibrate in body water. The deuterium is eliminated  
99 from the body as water and the elimination rate is thus proportional to water turnover. The <sup>18</sup>O is  
100 eliminated as water and carbon dioxide and thus its elimination is proportional to the sum of water  
101 turnover and carbon dioxide production. The difference between these two elimination rates is,  
102 therefore, proportional to carbon dioxide production. Total energy expenditure can be calculated from  
103 carbon dioxide production using common indirect calorimetric equations. The tracer elimination rates  
104 will be determined using equations of Schoeller et al. <sup>2</sup> from urines collected on the day the tracer is  
105 given by mouth at the beginning of each 2-week sleep period and again at the end of each 2-week

106 period. The DLW method has a coefficient of variance of  $\pm 1\%$  as determined in multiple laboratories  
107 and has been validated in various subject populations <sup>2-5</sup>.

108

#### 109 Body weight and body composition measurements

110 Body weight will be determined by the mean of two consecutive measurements obtained in the  
111 morning following an overnight fast and morning void. Whole body fat percentage will be measured  
112 using DXA. Body fat will be determined by multiplying body weight by the percentage of body fat from  
113 the DXA. The bone mineral content by DXA and body fat will be subtracted from body weight to  
114 determine fat-free mass. We have chosen DXA to measure body composition because it is the most  
115 reproducible procedure and thus provides us the highest power for a change in energy stores <sup>6</sup>, and  
116 early phase body composition changes have been previously quantified by DXA using sample sizes  
117 similar to that of the proposed studies [reviewed in <sup>7</sup>].

118

#### 119 Questionnaires

120 All eligible subjects will complete standard questionnaires (one time at baseline on Day 1) to  
121 capture their usual dietary habits (Three Factor Eating Questionnaire-TFEQ <sup>8</sup>), sleep quality  
122 (Pittsburgh Sleep Quality Index- PSQI <sup>9</sup>), chronotype (Morningness-Eveningness Questionnaire-  
123 MEQ <sup>10</sup>) and mood (Center for Epidemiologic Studies of Depression-CESD <sup>11</sup>).

124

#### 125 **Statistical analysis**

126 We propose to complete the study in 80 overweight young individuals (extension group [n=40]  
127 and control group [n=40]) using a randomized, controlled parallel-group design. We will obtain the  
128 same assessments during each 2-week sleep period (i.e. 2-week baseline and 2-week intervention  
129 periods) and changes from baseline will be compared between the extension and control groups.  
130 Mean (SD) values for all continuous variables and frequency distributions for all categorical variables  
131 will be used for descriptive analyses. Normality will be tested for all continuous variables. If there is  
132 evidence of non-normality, then a transformation such as the logarithm will be used. We will assess  
133 between group differences using a two-sided two-sample t-test at the significance level of 0.05. The  
134 nonparametric Wilcoxon rank-sum test will only be used if data transformation is not successful.  
135 Subjects' changes between the two sleep periods will be plotted to further explore inter-individual  
136 variability. We plan to account for dropouts as follows. Demographic and health characteristics of the  
137 subjects who have completed the study will be compared to those of the dropouts to assess for any  
138 evidence of bias. In addition to the analysis in those who completed the entire study (upon which the  
139 power calculations were conservatively based), analyses using all subjects with imputation of the  
140 missing data will be performed to ensure that findings are robust. Several imputation methods will be  
141 considered including multiple imputations or last observation carried forward as well as assuming that  
142 dropouts will have the worst/best outcome.

143 In secondary analyses, we will test the hypothesis that the amount of sleep extension will  
144 predict the magnitude of the beneficial effects on glucose metabolism, energy intake and energy  
145 expenditure. Average sleep duration in each 2-week period will be measured using the actiwatch <sup>12-14</sup>.  
146 For each subject, the average change in sleep duration will be calculated by subtracting the average  
147 sleep duration during the 2-week habitual sleep [baseline] period from the average sleep duration  
148 during the 2-week intervention period. Pearson correlation coefficients will be calculated, along with  
149 corresponding 95% confidence intervals, to assess the strength of the association, and linear  
150 regression models (with change in insulin sensitivity, energy intake and total energy expenditure as  
151 the dependent variable and the average increase in sleep duration as the independent variable) will  
152 be fit to get estimates of the magnitude of the effect.

153 In order to achieve a final sample size of 80 subjects, we anticipate that a total of 210 subjects  
154 will need to be enrolled over 5-year period as follows. We estimate that about one third of the 210  
155 subjects (n=70) will have sleep apnea or other sleep disorders by polysomnography, and about 20%  
156 of the remaining 140 subjects (n=30) will show abnormal findings on screening OGTT and routine  
157 blood tests, and thus be excluded. Based on our new preliminary study, we estimate that about 10%  
158 of the remaining 110 subjects (n=10) will drop out due to poor compliance with the actiwatch. Based

159 on our previous experience with protocols involving similar study duration and design, we estimate  
160 that about 20% of the remaining 100 subjects (n=20) will drop out during the actual 28-day protocol,  
161 and thus a total number of n=80 subjects will complete the study.  
162

### 163 **Human Subjects and Protection from Risk:**

#### 164 Human Subjects Involvement and Characteristics:

165 There will be no selection criteria based on gender, race or ethnic background. We will not  
166 recruit from vulnerable populations, such as pregnant women, prisoners, institutionalized individuals,  
167 or others who may be considered vulnerable populations. We will recruit 250 subjects to have a final  
168 study sample of n=80. We estimate that 50% of the subjects will be women.  
169

#### 170 Research Material:

171 Research material will be blood samples for metabolic and hormonal measurements,  
172 polysomnographic sleep recordings, data on activity and sleep-wake schedule from the actiwatch and,  
173 energy expenditure and intake, resting metabolic rate and thermic effect of meal, body composition  
174 measurements, and food diaries and visual analog scales for appetite and sleepiness. All material will  
175 be used only for research purposes and subject confidentiality will be protected according to  
176 guidelines. The data will be collected, stored, and managed in full compliance with HIPAA regulations  
177 as well as according to regulations by the IRB at the University of Chicago.  
178

#### 179 Potential Risks:

180 There may be minimal discomfort associated with venipuncture and slight bruising at the site  
181 that will recover in a short period of time. There is also slight risk of inflammation of the vein or  
182 infection. However, our nurses who perform these procedures are highly trained and thus these risks  
183 associated with intravenous puncture and blood withdrawals are minimal. The amount of blood  
184 withdrawn is minimized to prevent significant blood loss. Baseline hematocrit will be measured in all  
185 subjects to ensure that the risk is not excessive. Minor temporary skin irritation could occur with the  
186 surface electrodes or sensors used for screening sleep recordings and activity monitors. Dual-energy  
187 X-ray absorptiometry (DXA) scan is a noninvasive procedure and the amount of radiation exposure is  
188 extremely low (less than one-tenth of the dose received during a standard chest x-ray). Indirect  
189 calorimetry is a non-invasive measure of resting energy expenditure in which a clear plastic hood is  
190 placed over the head and shoulders for 40 minutes, during which time the subject can watch TV and  
191 relax. The hood may lead to feelings of claustrophobia. Doubly labeled water method involves the use  
192 of water containing two stable isotopic tracers, <sup>2</sup>H (deuterium) and <sup>18</sup>O. These two tracers are not  
193 radioactive and do not expose the subjects to any ionizing radiation. The method has been used to  
194 measure total energy expenditure and body water in thousands of subjects including neonates,  
195 pregnant and lactating women, children, and adults in many different state of health and disease  
196 (Schoeller DA.J Nutr,1999). Dr.Schoeller's laboratory alone has collaborated on over 3,000 such  
197 studies. To our knowledge, no serious adverse events have been reported. The safety of the use of  
198 doubly labeled water have been summarized in a user's manual prepared by the International Atomic  
199 Energy Agency beginning (Schoeller DA et al, IAEA page 3. Human Health Series No. 3, Vienna,  
200 2009). There are no other known risks involved in any of the other measurement procedures.  
201

#### 202 Procedures For Protecting Against Risk:

203 Every effort will be made by all study personnel to protect subjects' safety and minimize risk.  
204 The risks associated with blood drawing will be minimized by using sterile techniques, close  
205 supervision and care of all catheter sites, and by applying pressure to the puncture site after removal  
206 of the needle or catheter. A cooling or heating apparatus will be available in the event that local  
207 venipuncture site swelling develops. The amount of blood withdrawn will be minimized in accordance  
208 with the University of Chicago Institutional Review Board regulations. Baseline hematocrit will be  
209 measured in all subjects to ensure that the risk is not excessive. A nutritionist will be present during  
210 indirect calorimetric testing and we will exclude subjects with claustrophobia. A physician will be in the  
211 immediate vicinity during all invasive procedures. If a subject discloses the intent to harm himself or

212 herself, the immediacy of the situation will be determined and the subject will be referred for  
213 psychiatric counseling or taken to a treatment facility. In the event of physical injury resulting from this  
214 research, the University of Chicago Hospitals will provide free emergency medical care.  
215 Confidentiality of the subjects will be preserved.

216  
217 Inclusion of Women and Minorities

218 The proposed studies will be open to enrollment to both women and men. We proposed to  
219 complete the study in 80 subjects and we estimate that 50% will be women. There will be no selection  
220 criteria based on race or ethnic background. Based on our local demographic as well as the estimated  
221 prevalence of short sleep duration in the general population, it is anticipated that minority subjects will  
222 be well represented in the proposed studies.

223  
224 Inclusion of Children

225 Children will not be enrolled in the proposed studies. Although there is epidemiologic evidence  
226 for an association with short sleep duration and obesity risk in children, there are no sufficient data  
227 from well-controlled laboratory studies in children to justify the inclusion of children in this project.  
228 Moreover, children have a different physiology for sleep need than adult population, therefore  
229 studying children remains beyond the focus of the current proposal and the minimum age requirement  
230 will be 21 years.

231  
232 **Data & Safety Monitoring Plan:**

233 Prior to initiation of the study, the University of Chicago Institutional Review Board (IRB) will  
234 review and approve the protocol. The IRB will continue to review the progress of the protocol at least  
235 annually following initial approval. IRB requires that the investigators report enrollment and dropout  
236 rates, any protocol deviations, any adverse events (expected, unexpected and serious) and general  
237 progress of the study. The research procedures performed in this study are considered minimal to  
238 moderate risk and therefore a formal Data Safety Monitoring Committee will not be necessary per the  
239 University of Chicago IRB guidelines. During the protocol procedures that require inpatient or  
240 outpatient hospital admission, the subjects will be monitored daily by a physician investigator and  
241 nursing staff. As part of the NIH funded Clinical and Translational Science Awards (CTSA) program at  
242 the University of Chicago, Gary Toback MD, PhD serves as the Research Subject Advocate. His role  
243 is to monitor and ensure the safety of research participants for all protocols that are being conducted  
244 at the Clinical Resource Center at the University of Chicago. Dr.Toback will also participate in the  
245 process of data and safety monitoring in the proposed studies. Any adverse events will be reported  
246 immediately to the investigator for evaluation. Any unanticipated problem will be evaluated by the PI  
247 and reported immediately to the IRB if the problem is life threatening, within 10 days if serious, or in  
248 the annual continuing review report if it does not affect risk to the subject.

249  
250 **Compensation**

251 Subjects participating in the study will receive \$2300 in compensation upon completion of the  
252 entire study. Subjects will receive \$75 for completing the screening procedures, and \$2225 for  
253 completing the entire 28-day study phase including 4 half days metabolic testing in the research unit.

254  
255 **Subject Recruitment:**

256 Subjects will be recruited from the local community using flyers and web advertisements. All  
257 paper advertisements will indicate a standard email address ([sleepstudy@uchicago.edu](mailto:sleepstudy@uchicago.edu)), which will  
258 auto-reply to send to the volunteers a web link of an online pre-screening survey administered under  
259 REDCap at the University of Chicago. The web-based advertisement will indicate the web link for  
260 volunteers to click on. The REDCap consortium supports a secure web application designed  
261 exclusively to support data capture for research studies.

262 This initial online pre-screening process will help to determine whether volunteers meet the  
263 initial eligibility criteria (e.g. age, BMI etc.) and thus will allow the investigators to minimize the number  
264 of subjects who will undergo the laboratory screening tests. Study investigators will only contact the

265 volunteers who meet the initial eligibility criteria to schedule a face-to-face interview in the sleep  
266 laboratory for the informed consent process. To contact the volunteers, the investigators will use the  
267 email address that the volunteers provided on the online survey. During face-to face interview, the  
268 nature of the research project will be described in detail to the subjects and written informed consent  
269 will be obtained after a member of the research team has explained all details of the study, and the  
270 subject has received satisfactory answers to all of his/her questions.

271 Overweight men and women (age: 21-40 years; BMI: 25.0 to 29.9 kg/m<sup>2</sup>) who habitually sleep  
272 on average 6.5 hours or less per night (as confirmed by actigraphy) will be studied. Subjects will be  
273 required to have stable sleep habits for the past 6 months. Exclusion criteria will be: obstructive sleep  
274 apnea by laboratory polysomnography or history of any other sleep disorder, night or rotating shift  
275 work (current or in the past 2 years), habitual daytime naps, recent (< 4 week) travel across time  
276 zones, extreme chronotypes, any acute or chronic medical condition, diabetes, prior or current eating  
277 or psychiatric disorders, claustrophobia, irregular menstrual periods, menopause, pregnancy, alcohol  
278 abuse, excessive caffeine intake, smoking, illegal drug use, subjects who are currently following a  
279 weight loss regimen or any other special diet or exercise programs, subjects who have received iv or  
280 oral contrast in the past 2 weeks, and abnormal findings on screening blood testing. Subjects will also  
281 be required not to take any prescription medication that can affect sleep or metabolism with the  
282 exception of antihypertensive and lipid lowering agents as follows. Subjects who are taking anti-  
283 hypertensive medication and/or lipid-lowering agents will be included only if they are well controlled  
284 and on a stable regimen (no change in medications in the previous 3 months). However, beta-  
285 blockers and thiazide diuretics will not be allowed, as these medications are known to affect insulin  
286 sensitivity. Women will be required to not be on hormone replacement therapy.

287 Subjects who meet the eligibility criteria will undergo the following laboratory screening  
288 procedures: Step1: an overnight laboratory polysomnography to rule out obstructive sleep apnea and  
289 other sleep disorders. Subjects who fail Step1 screening will not continue to Step2. Step2: physical  
290 examination, screening laboratory blood tests (complete blood count, complete metabolic panel,  
291 lipids, and pregnancy test for women) and a standard morning 2-h OGTT (to exclude diabetes; 1  
292 fasting blood samples and 1 blood sample at 2-hour). Subjects will wear the actiwatch for one week to  
293 confirm habitual sleep duration of 6.5 hours or less. Subjects who pass the Step2 screening  
294 procedures will be eligible for the protocol.

295

296

## 297 REFERENCES CITED

298

- 299 1. Cobelli C, Toffolo GM, Dalla Man C, et al. Assessment of beta-cell function in humans,  
300 simultaneously with insulin sensitivity and hepatic extraction, from intravenous and oral  
301 glucose tests. *Am J Physiol Endocrinol Metab.* 2007;293(1):E1-E15.
- 302 2. Schoeller DA. Measurement of energy expenditure in free-living humans by using doubly  
303 labeled water. *The Journal of nutrition.* 1988;118(11):1278-1289.
- 304 3. Ravussin E, Gautier JF. Metabolic predictors of weight gain. *Int J Obes Relat Metab Disord.*  
305 1999;23 Suppl 1:37-41.
- 306 4. Westterterp KR, Brouns F, Saris WH, ten Hoor F. Comparison of doubly labeled water with  
307 respirometry at low- and high-activity levels. *J Appl Physiol.* 1988;65(1):53-56.
- 308 5. Seale JL, Rumpler WV, Conway JM, Miles CW. Comparison of doubly labeled water, intake-  
309 balance, and direct- and indirect-calorimetry methods for measuring energy expenditure in  
310 adult men. *The American journal of clinical nutrition.* 1990;52(1):66-71.
- 311 6. Heymsfield SB, Pietrobelli A, Wang Z, Saris WH. The end of body composition methodology  
312 research? *Current opinion in clinical nutrition and metabolic care.* 2005;8(6):591-594.
- 313 7. Heymsfield SB, Thomas D, Nguyen AM, et al. Voluntary weight loss: systematic review of  
314 early phase body composition changes. *Obesity reviews : an official journal of the International*  
315 *Association for the Study of Obesity.* 2011;12(5):e348-361.
- 316 8. Stunkard AJ, Messick S. The three-factor eating questionnaire to measure dietary restraint,  
317 disinhibition and hunger. *J Psychosom Res.* 1985;29(1):71-83.

- 318 9. Buysse DJ, Reynolds CF, 3rd, Monk TH, Berman SR, Kupfer DJ. The Pittsburgh Sleep Quality  
319 Index: a new instrument for psychiatric practice and research. *Psychiatry Res.* 1989;28(2):193-  
320 213.
- 321 10. Horne JA, Ostberg O. A self-assessment questionnaire to determine morningness-  
322 eveningness in human circadian rhythms. *Int J Chronobiol.* 1976;4(2):97-110.
- 323 11. Roberts RE, Vernon SW. The Center for Epidemiologic Studies Depression Scale: its use in a  
324 community sample. *The American journal of psychiatry.* 1983;140(1):41-46.
- 325 12. Knutson KL, Rathouz PJ, Yan LL, Liu K, Lauderdale DS. Intra-individual daily and yearly  
326 variability in actigraphically recorded sleep measures: the CARDIA study. *Sleep.*  
327 2007;30(6):793-796.
- 328 13. Lauderdale D, Knutson K, Lijing L, Rathouz PJ, Hulley SB, Liu K. Objectively Measured Sleep  
329 Characteristics among Early-Middle-Aged Adults The CARDIA Study. *Am J Epidemiol*  
330 2006;164(1):5-16.
- 331 14. Jean-Louis G, von Gizycki H, Zizi F, Spielman A, Hauri P, Taub H. The actigraph data analysis  
332 software: I. A novel approach to scoring and interpreting sleep-wake activity. *Percept Mot*  
333 *Skills.* 1997;85(1):207-216.  
334  
335
