# Supplementary material for: Effect of Sleep Extension on Objectively Assessed Energy Intake Among Adults With Overweight in Real-life Settings: A Randomized Clinical Trial
Source: PubMed Central journal article supplement (PMC8822469; doi:10.1001/jamainternmed.2021.8098), 2022-02-07
Supplement: jamainternmed-e218098-s003.pdf [file jamainternmed-e218098-s003.pdf]

## Data Sharing Statement

Tasali. Effect of Sleep Extension on Objectively Assessed Energy Intake Among Adults With Overweight in Real-Life Settings. *JAMA Intern Med.* Published February 07, 2022.  
doi:10.1001/jamainternmed.2021.8098

### Data

**Data available:** No

### Additional Information

**Explanation for why data not available:** Data will be shared in clinical trial.gov after publication
